# Supplementary material
Source: PubMed Central journal article supplement (PMC5087129)
Supplement: NIHMS814112-supplement-Supplemental_Tables_1_and_2.pdf [file NIHMS814112-supplement-Supplemental_Tables_1_and_2.pdf]

**Supplementary Table 1:** Immunophenotypical features used to distinguish various subtypes of dendritic cells and macrophages.

| <b>Characteristics</b>          | <b>LC</b>                       | <b>IDC</b>                      | <b>FDC</b>            | <b>PDC</b>                      | <b>Macrophages</b>              |
|---------------------------------|---------------------------------|---------------------------------|-----------------------|---------------------------------|---------------------------------|
| <b>Cellular Origins</b>         | Hematopoietic Myeloid Stem Cell | Hematopoietic Myeloid Stem Cell | Mesenchymal Stem Cell | Hematopoietic Myeloid Stem Cell | Hematopoietic Myeloid Stem Cell |
| <b>Immunophenotypic Markers</b> |                                 |                                 |                       |                                 |                                 |
| <b>MHC-Class II</b>             | Cytoplasmic +                   | Surface +                       | --                    | +                               | +                               |
| <b>CD11c</b>                    | +                               | +                               | --                    | +                               | +                               |
| <b>CD14</b>                     | --                              | --                              | --                    | --                              | ++                              |
| <b>CD3</b>                      | --                              | --                              | --                    | --                              | --                              |
| <b>CD19</b>                     | --                              | --                              | --                    | --                              | --                              |
| <b>CD56</b>                     | --                              | --                              | --                    | --                              | --                              |
| <b>Glycophorin A</b>            | --                              | --                              | --                    | --                              | --                              |
| <b>CD1a</b>                     | ++                              | --                              | --                    | --                              | --                              |
| <b>CD21</b>                     | --                              | --                              | ++                    | --                              | --                              |
| <b>CD23</b>                     | --                              | --                              | ++                    | --                              | --                              |
| <b>CD35</b>                     | --                              | --                              | ++                    | --                              | --                              |
| <b>CD68</b>                     | +/-                             | +/-                             | -/+                   | +                               | ++                              |
| <b>CD163</b>                    | --                              | --                              | --                    | --                              | ++                              |
| <b>CD52</b>                     | --                              | --                              | --                    | --                              | +                               |
| <b>Lysozyme</b>                 | +/-                             | --                              | --                    | --                              | ++                              |
| <b>Langerin</b>                 | ++                              | --                              | --                    | --                              | --                              |
| <b>S100</b>                     | ++                              | ++                              | +/-                   | --                              | +/-                             |
| <b>CD123</b>                    | --                              | --                              | --                    | ++                              | --                              |
| <b>CD303 (BDCA2)</b>            | --                              | --                              | --                    | ++                              | --                              |
| <b>CD304 (BDCA4)</b>            | --                              | --                              | --                    | ++                              | --                              |

**Note:** LC, Langerhans cell; IDC, interdigitating dendritic cell; FDC, follicular dendritic cell; PDC, plasmacytoid dendritic cell. Expression is semi-quantitatively graded as follows: negative (--); occasionally positive (-/+); weakly positive (+/-); positive (+); and strongly positive (++).

Source: Swerdlow *et al*, 2008; Merad *et al*, 2013; Pileri *et al*, 2002.

**Supplementary Table 2: Risk factors between patients who received neo- or adjuvant therapy versus observation**

|                            | Follicular Dendritic Cell Sarcoma |                                           |         | Histiocytic Sarcoma   |                                          |         |
|----------------------------|-----------------------------------|-------------------------------------------|---------|-----------------------|------------------------------------------|---------|
|                            | No Therapy (n = 12)               | Adjuvant or neo-adjuvant therapy (n = 11) | P-value | No Therapy (n = 4)    | Adjuvant or neo-adjuvant therapy (n = 2) | P-value |
| Age, years                 | 38.7<br>(28.7 – 83)               | 53.1<br>(31.6 – 71.9)                     | 0.09    | 45.1<br>(23.6 – 57.9) | 42.6<br>(27.9 – 57.3)                    | 1       |
| Tumor size (% of patients) |                                   |                                           | 1       |                       |                                          | 0.4     |
| 0 – 5 cm                   | 3 (25)                            | 4 (36)                                    |         | 3 (75)                | -                                        |         |
| 5.1 – 10 cm                | 5 (42)                            | 4 (36)                                    |         | 1 (25)                | -                                        |         |
| 10.1 – 15 cm               | 2 (17)                            | 1 (9)                                     |         | -                     | 1 (50)*                                  |         |
| 15.1 – 20 cm               | 1 (8)                             | -                                         |         | -                     | -                                        |         |
| Gender                     |                                   |                                           | 0.02    |                       |                                          | 1       |
| Female                     | 5 (42)                            | 10 (91)                                   |         | 2 (50)                | 1 (50)                                   |         |
| Male                       | 7 (58)                            | 1 (9)                                     |         | 2 (50)                | 1 (50)                                   |         |
| KPS                        |                                   |                                           | 0.30    |                       |                                          | NA      |
| < 80%                      | 2 (17)                            | 4 (36)                                    |         | 4 (100)               | 2 (100)                                  |         |
| 90 – 100%                  | 7 (58)                            | 3 (27)                                    |         | -                     | -                                        |         |
| Location                   |                                   |                                           | 0.29    |                       |                                          | 0.6     |
| Head and neck              | 3 (25)                            | 5 (45)                                    |         | -                     | 1 (50)                                   |         |
| Thoracic/chest wall        | 2 (17)                            | 4 (36)                                    |         | 1 (25)                | -                                        |         |
| Abdomen/Pelvis             | 6 (50)                            | 2 (18)                                    |         | 3 (75)                | 1 (50)                                   |         |
| Paraspinal/CNS/Other       | 1 (8)                             | -                                         |         | -                     | -                                        |         |
| Margin                     |                                   |                                           | 0.09    |                       |                                          | NA      |
| Negative                   | 8 (67)                            | 11 (100)                                  |         | 4 (100)               | 2 (100)                                  |         |
| Positive                   | 2 (17)                            | -                                         |         | -                     | -                                        |         |
| Unknown                    | 2 (17)                            | -                                         |         | -                     | -                                        |         |

\* Size was unknown for the other patient.
